# Supplementary material for: μ-XAFS of a single particle of a practical NiOx/Ce2Zr2Oy catalyst
Source: Royal Society of Chemistry journal article supplement (doi:10.1039/c1cp20895k), 2011-01-01
Supplement: c1cp20895k.pdf [file c1cp20895k.pdf]

## Electronic Supplementary Information 1

### 1. Sample preparation

$\text{Ce}_2\text{Zr}_2\text{O}_8$  prepared by co-precipitation of aqueous solutions of  $\text{Ce}(\text{NO}_3)_3 \cdot 6\text{H}_2\text{O}$  and  $\text{ZrO}(\text{NO}_3)_2 \cdot 2\text{H}_2\text{O}$  [6] (obtained from Toyota Central R&D Labs. Inc.), was calcined at 773 K for 3 h.  $\text{Ni}(\text{NO}_3)_2 \cdot 6\text{H}_2\text{O}$  (Ni 1 wt%) was impregnated to the calcined  $\text{Ce}_2\text{Zr}_2\text{O}_8$  in water, and the obtained sample was dried, followed by calcination at 773 K for 3 h ( $\text{NiO}_x/\text{Ce}_2\text{Zr}_2\text{O}_8$ ). 10 mg of prepared  $\text{NiO}_x/\text{Ce}_2\text{Zr}_2\text{O}_8$  were suspended into 100 ml of ethanol with ultra-sonic vibration. Then a  $\text{SiO}_2$  thin membrane (obtained from Atok; 5 mm x 10 mm x 30  $\mu\text{m}$ ) was dipped to the suspension and dried in air. These processes were repeated three times and the obtained sample was finally calcined at 773 K for 1 h. A reduced sample ( $\text{NiO}_x/\text{Ce}_2\text{Zr}_2\text{O}_7$ ) was prepared by the further treatment of prepared  $\text{NiO}_x/\text{Ce}_2\text{Zr}_2\text{O}_8$  on the  $\text{SiO}_2$  membrane with  $\text{H}_2$  (13.3 kPa) at 773 K for 0.5 h. All prepared samples were stored under  $\text{N}_2$  atmosphere.

### 2. XRD

XRD of the oxidized and reduced samples was recorded on a Rigaku Multiflex-STe diffractometer.

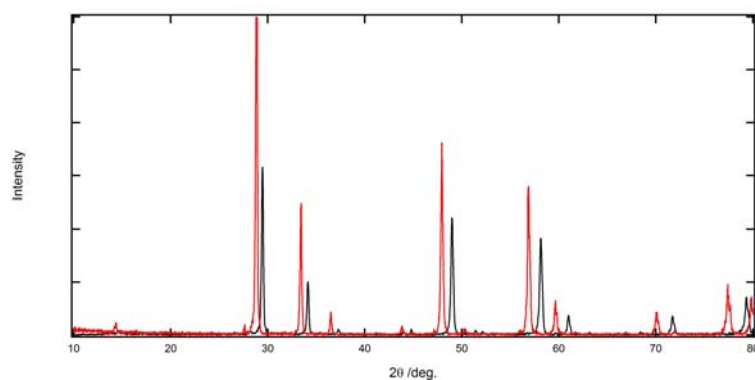

Figure SI 1: XRD patterns of  $\text{NiO}_x/\text{Ce}_2\text{Zr}_2\text{O}_7$  (red) and  $\text{NiO}_x/\text{Ce}_2\text{Zr}_2\text{O}_8$  (black).

### 3. SEM

SEM images of  $\text{NiO}_x/\text{Ce}_2\text{Zr}_2\text{O}_y$  on  $\text{SiO}_2$  membranes were recorded by JEOL JSM-6701F Field Emission SEM in SEI (Secondary Electron Imaging) mode. Electron accelerating volt was 1.0 kV. The average particle size of  $\text{NiO}_x/\text{Ce}_2\text{Zr}_2\text{O}_y$  and the number of  $\text{NiO}_x/\text{Ce}_2\text{Zr}_2\text{O}_y$  particles on  $\text{SiO}_2$  membranes were estimated by using SEM images (size: 128.0  $\mu\text{m}$  x 102.4  $\mu\text{m}$ ). The fractions of isolated and aggregated catalyst particles on the  $\text{SiO}_2$  membranes were estimated from the SEM images.

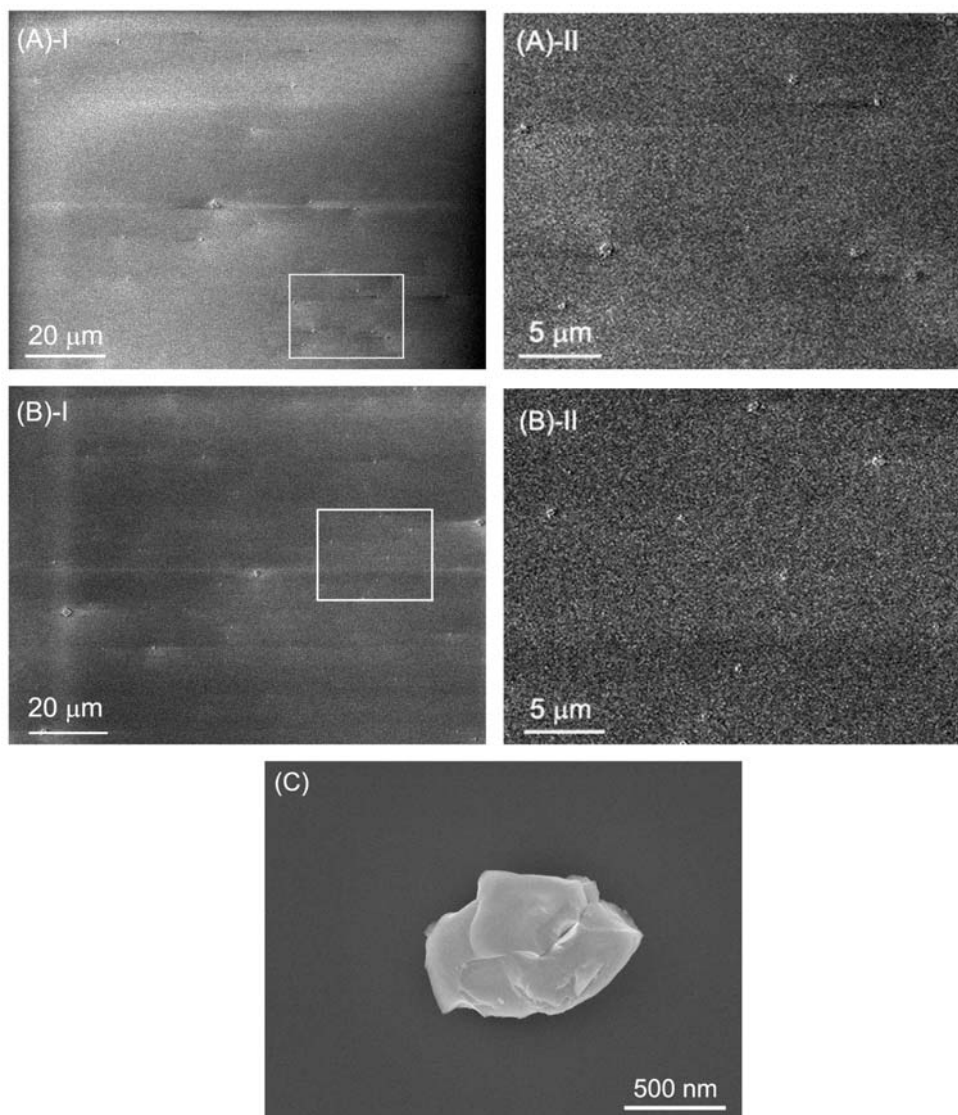

Figure SI 2: SEM images of (A) reduced  $\text{NiO}_x/\text{Ce}_2\text{Zr}_2\text{O}_7$  and (B) oxidized  $\text{NiO}_x/\text{Ce}_2\text{Zr}_2\text{O}_8$  dispersed on  $\text{SiO}_2$  membranes. White squares in I represent each areas of II. (C) A SEM image of a single particle of  $\text{NiO}_x/\text{Ce}_2\text{Zr}_2\text{O}_8$  on a Si substrate. The single particle was composed of multi-domains.

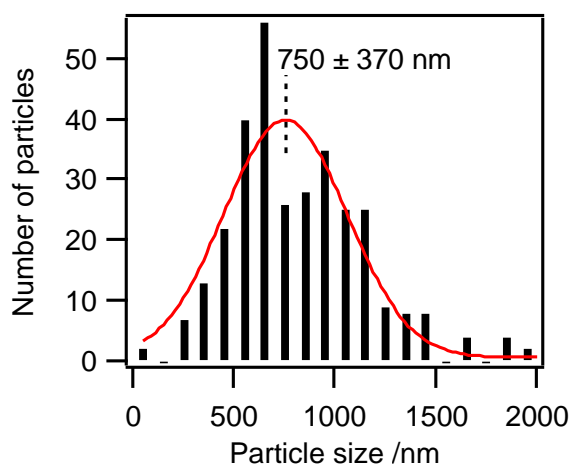

Figure SI 3: Particle size distribution of  $\text{NiO}_x/\text{Ce}_2\text{Zr}_2\text{O}_y$ . Average particle size was estimated to be  $750 \pm 370 \text{ nm}$ .

Table SI 1: Numbers of isolated and aggregated NiO<sub>x</sub>/Ce<sub>2</sub>Zr<sub>2</sub>O<sub>y</sub> particles on SiO<sub>2</sub> membranes

| Sample                                                                        | Number of isolated particles | Number of aggregated particles | Density of isolated particles           | Aggregated particles % |
|-------------------------------------------------------------------------------|------------------------------|--------------------------------|-----------------------------------------|------------------------|
| (A) reduced NiO <sub>x</sub> /Ce <sub>2</sub> Zr <sub>2</sub> O <sub>7</sub>  | 52                           | 1                              | 4.0 x 10 <sup>-3</sup> μm <sup>-2</sup> | 1.9%                   |
| (B) oxidized NiO <sub>x</sub> /Ce <sub>2</sub> Zr <sub>2</sub> O <sub>8</sub> | 151                          | 1                              | 1.2 x 10 <sup>-2</sup> μm <sup>-2</sup> | 0.7%                   |

A SEM image: 128.0 μm x 102.4 μm. The numbers of isolated and aggregated NiO<sub>x</sub>/Ce<sub>2</sub>Zr<sub>2</sub>O<sub>y</sub> particles were counted by Figure SI 2 (A)-I or (B)-I, respectively.

(Density of isolated particles) = (number of isolated particles) / (SEM image area of I (128.0 μm x 102.4 μm)).

(Percentage of aggregated particles) = {(number of aggregated particles) / [(number of isolated particles) + (number of aggregated particles)]} x 100.

## Electronic Supplementary Information 2

### 1. μ-XRF and μ-XAFS

Scanning μ-XRF and μ-XAFS measurements were conducted at the BL37XU undulator beamline at SPring-8 (8 GeV, 100 mA). X-rays from an undulator were monochromatized by a Si(111) double-crystal monochromator and horizontally and vertically focused by Kirkpatrick-Baez (KB) mirrors (Figure SI 4). The focusing size of the X-ray μ-beam was 1000 nm (h) x 800 nm (v) at Ni K-edge (8332 eV) (Figure SI 5). A SiO<sub>2</sub> membrane dispersing the Ni catalyst particles was enclosed in an in-situ XAFS cell (Figure SI 6) with flowing of N<sub>2</sub>. The XAFS cell was mounted on a piezoelectric translation stage (Physik Instrumente P-517) and the sample was put on the focusing point of the KB mirror.

Fluorescent X-rays emitted from a sample were detected by a 19-element Ge detector. Scanning μ-XRF mapping was performed by X-ray excitation at 8424 eV and the piezoelectric translation stage was moved every 200 nm. 2-Dimensional XRF images were obtained for both Ni Kα (7478 eV) line and Ce Lα (4840 eV) + Lβ<sub>1</sub> (5262 eV) lines detected for 1 or 2 s at each point. 2D mapping in Fig. 1 (A) and (B)/(C) was performed for 23 min (2 s x 676 points (26 points (h) x 26 points (v))) and 8 min (1 s x 441 points (21 points (h) x 21 points (v))), respectively. Ni K-edge μ-XANES (150 points) was measured for 45 min at the centre position of high intensity area of the XRF 2D-mapping. The amount of Ni atoms was estimated to be in the order of 10<sup>7</sup> in a catalyst particle of 750 nm in diameter. Ni K-edge μ-EXAFS (300 points) was measured for 3 h at a similar position to the μ-XANES.

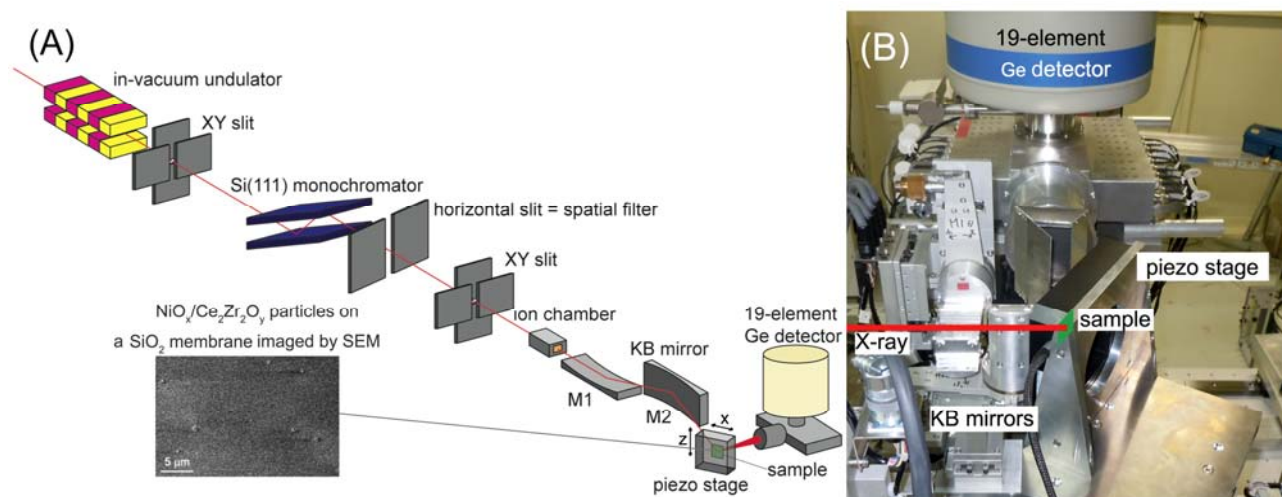

Figure SI 4: (A) A schematic diagram and (B) experimental setup of μ-XAFS.

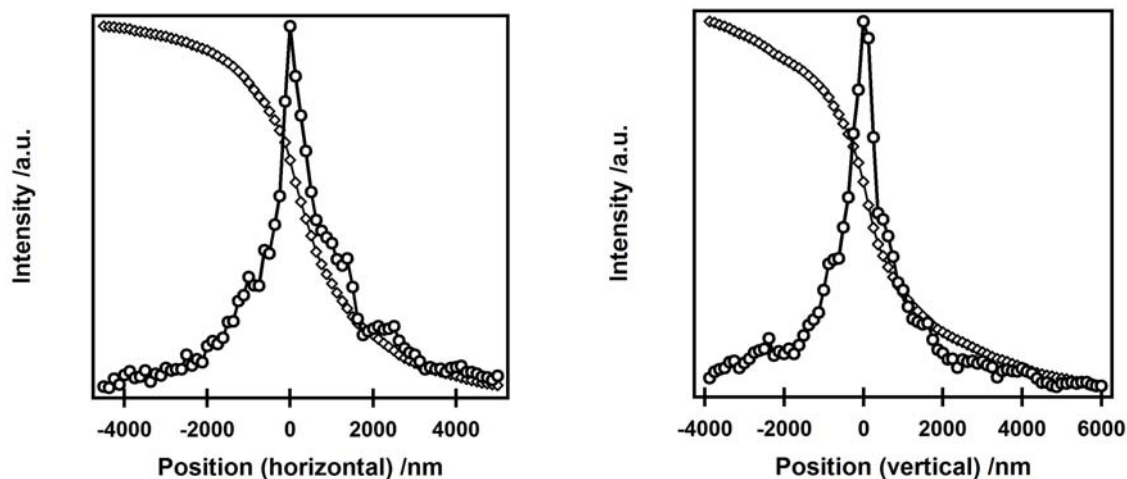

Figure SI 5: Measured profiles of focused beam at the X-ray energy of 8 keV. (left) Beam profile in the horizontal direction and (right) beam profile in the vertical direction. ◇: Raw data of knife-edge scan and ○: numerical derivative of the raw profiles.

## 2. Conventional XAFS

Conventional XAFS measurements using mm-order X-ray beam were conducted at the BL12C station at KEK-PF (2.5 GeV, 450 mA). X-rays were monochromatized by a Si(111) double-crystal monochromator and X-ray beam size was 1 mm (h) x 1 mm (v). An ion chamber filled with N<sub>2</sub> was used to detect I<sub>0</sub> and that filled with the mixture of N<sub>2</sub> (85%) and Ar (15%) (in a transmission mode) or a Lytle detector filled with Ar (in a fluorescent mode) was used to detect I. XAFS spectra were measured in step-scan mode at room temperature.

## 3. In-situ $\mu$ -XAFS cell

An in-situ XAFS cell was used for scanning  $\mu$ -XRF and  $\mu$ -XAFS measurements.

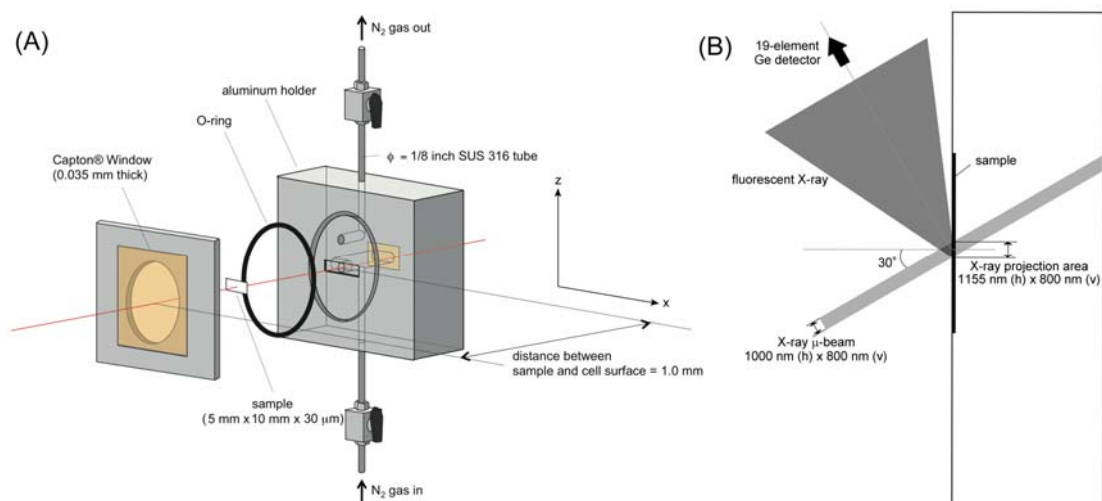

Figure SI 6: (A) A schematic of an in-situ  $\mu$ -XAFS cell.  
(B) A schematic of X-ray projection and the angle of incidence to the sample.

### Electronic Supplementary Information 3

Table SI 2: Catalytic performances of methane steam reforming at 923 K over different catalysts

| Catalyst                                                                      | CH <sub>4</sub> conv.% | H <sub>2</sub> O conv.% | Selectivity C%        | Selectivity H%    |
|-------------------------------------------------------------------------------|------------------------|-------------------------|-----------------------|-------------------|
|                                                                               |                        |                         | (CO/CO <sub>2</sub> ) | (H <sub>2</sub> ) |
| Pt/Ce <sub>2</sub> Zr <sub>2</sub> O <sub>8</sub>                             | 39                     | 49                      | 81 / 19               | 96                |
| Pt/Ce <sub>2</sub> Zr <sub>2</sub> O <sub>7</sub>                             | 39                     | 47                      | 80 / 20               | 93                |
| NiO <sub>x</sub> /Ce <sub>2</sub> Zr <sub>2</sub> O <sub>8</sub>              | 0                      | 0                       | - / -                 | -                 |
| NiO <sub>x</sub> /Ce <sub>2</sub> Zr <sub>2</sub> O <sub>7</sub>              | 75                     | 95                      | 89 / 9                | 91                |
| NiO <sub>x</sub> /Ce <sub>2</sub> Zr <sub>2</sub> O <sub>7</sub> <sup>a</sup> | 94                     | >99                     | 98 / 2                | 96                |

CH<sub>4</sub>/H<sub>2</sub>O/He = 2.8/2.8/94.4, catalyst = 0.1 g, GHSV = 14,700 h<sup>-1</sup>. <sup>a</sup> 973 K.

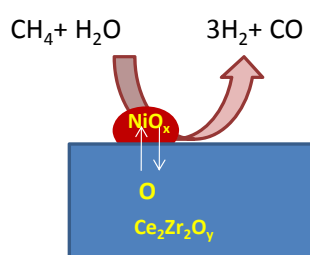

### Electronic Supplementary Information 4

#### 1. Background subtraction and extraction of Ni K-edge EXAFS oscillations

EXAFS spectra were analyzed by Iffeffit (Athena and Artemis) ver. 1.2.11 [7]. Background subtraction was performed with Autobk and Spline smoothing algorithm in the Athena program.  $k^3$ -Weighted EXAFS oscillations were Fourier transformed into  $R$ -space.

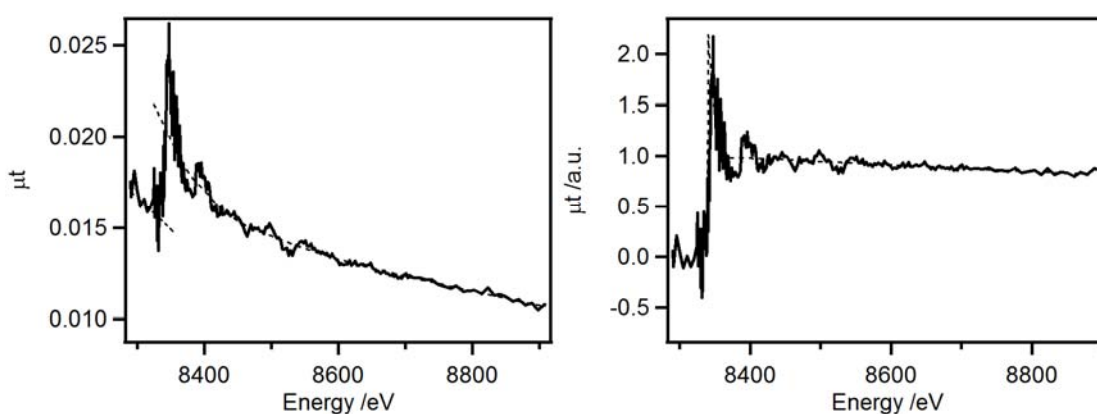

Figure SI 7: (left) A raw spectrum of Ni K-edge  $\mu$ -XAFS of a NiO<sub>x</sub>/Ce<sub>2</sub>Zr<sub>2</sub>O<sub>8</sub> single particle. Bold line: raw data and dashed lines: pre- and post-edge lines for normalization. (right) A normalized  $\mu$ -XAFS spectrum of the raw  $\mu$ -XAFS data. Bold line: normalized data and dashed line: background line for the extraction of EXAFS oscillation.

## 2. Curve-fitting analysis of Ni K-edge EXAFS in $R$ -space

Curve-fitting analysis in  $R$ -space was carried out, considering single scattering of 1st and 2nd coordination shells of Ni oxide.  $k$ - and  $R$ -range for the curve-fitting were 30-110 nm<sup>-1</sup> and 0.1-0.3 nm, respectively. Fitting parameters were coordination number (CN), interatomic distance ( $R$ ), Debye-Waller factor ( $\sigma^2$ ), and correction-of-edge energy ( $\Delta E_0$ ). Phase shifts and backscattering amplitudes were calculated by the FEFF8 code [8]. R-factor ( $R_f$ ) of the curve-fitting in  $R$ -space was defined as equations (eq. 1),

$$R_f = \frac{\sum_i \{ [\text{Re}(\tilde{\chi}_{\text{data}}(R_i) - \tilde{\chi}_{\text{fit}}(R_i))]^2 + [\text{Im}(\tilde{\chi}_{\text{data}}(R_i) - \tilde{\chi}_{\text{fit}}(R_i))]^2 \}}{\sum_i \{ [\text{Re}(\tilde{\chi}_{\text{data}}(R_i))]^2 + [\text{Im}(\tilde{\chi}_{\text{data}}(R_i))]^2 \}} \quad (\text{eq. 1}).$$

$\tilde{\chi}(R)$ s were Fourier transforms of  $k^3$ -weighted EXAFS oscillations.

## 3. Curve-fitting analysis of Ni K-edge EXAFS in $k$ -space

Curve-fitting analysis in  $k$ -space was also carried out, considering multiple scattering taken into account up to 6th coordination, 9 shells with the half path length up to 0.52 nm.  $k$ -Range for the curve-fitting was 30-110 nm<sup>-1</sup>. Fitting parameters were  $S_0^2$ , isotropic distance expansion/contraction ( $\alpha$ ), correction-of-edge energy ( $\Delta E_0$ ), and eight Debye-Waller factors ( $\sigma^2$ ), for every single scattering path and multiple scattering paths of 4th coordination [9]. Coordination number (CN) and distance ( $R$ ) of the shell were represented as  $\text{CN} = S_0^2 \times (\text{degeneration})$ , and  $R = \alpha \times (\text{initial half path length } R_{\text{eff}})$ , respectively. The degeneration and  $R_{\text{eff}}$  of each shell were delivered from model structure given by XRD [10]. Phase shifts and backscattering amplitudes were calculated by the FEFF8 code [8]. R-factor ( $R_f$ ) of the curve-fitting in  $k$ -space was defined as equations (eq. 2),

$$R_f = \frac{\sum_i \{ [\tilde{\chi}_{\text{data}}(k_i) - \tilde{\chi}_{\text{fit}}(k_i)]^2 \}}{\sum_i \{ [\tilde{\chi}_{\text{data}}(k_i)]^2 \}} \quad (\text{eq. 2}).$$

$\tilde{\chi}(k)$ s were  $k^3$ -weighted EXAFS oscillations.

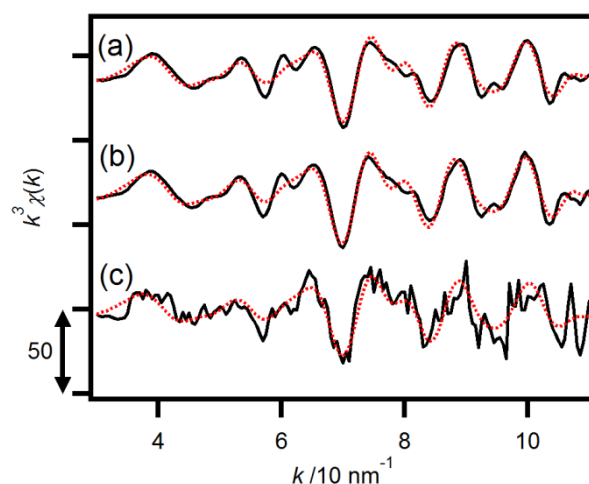

Figure SI 8:  $k^3$ -Weighted  $\chi(k)$  oscillations of (a) conventional EXAFS of NiO, (b) conventional EXAFS of  $\text{NiO}_x/\text{Ce}_2\text{Zr}_2\text{O}_8$ , and (c)  $\mu$ -EXAFS of  $\text{NiO}_x/\text{Ce}_2\text{Zr}_2\text{O}_8$ .

Black lines: observed data and red dotted lines: curve-fitted data.

Table SI 3 Results of curve-fitting analysis of Ni K-edge EXAFS in *k*-space

| Shell                                                                                                                                   | degen. | $R_{\text{eff}}/\text{nm}$ | CN             | $R/\text{nm}$     | $\sigma^2/10^{-5}\text{ nm}$ |
|-----------------------------------------------------------------------------------------------------------------------------------------|--------|----------------------------|----------------|-------------------|------------------------------|
| NiO measured by conventional EXAFS (beam size: 1 mm x 1 mm)                                                                             |        |                            |                |                   |                              |
| $k = 30 - 110\text{ nm}^{-1}$ , $R_f = 10\%$ , $S_0^2 = 0.96 \pm 0.11$ , $\alpha = 1.000 \pm 0.005$ , $\Delta E_0 = -1 \pm 3\text{ eV}$ |        |                            |                |                   |                              |
| Ni(0)-O(1)-Ni(0)                                                                                                                        | 6      | 2.0842                     | $5.8 \pm 0.7$  | $0.208 \pm 0.001$ | 5.6                          |
| Ni(0)-Ni(2)-Ni(0)                                                                                                                       | 12     | 2.9475                     | $11.5 \pm 1.3$ | $0.295 \pm 0.001$ | 6.4                          |
| Ni(0)-O(3)-Ni(0)                                                                                                                        | 8      | 3.6099                     | $7.7 \pm 0.9$  | $0.361 \pm 0.002$ | $18 \pm 33$                  |
| Ni(0)-Ni(4)-Ni(0)                                                                                                                       | 6      | 4.1684                     | $5.8 \pm 0.7$  | $0.417 \pm 0.002$ | $-0 \pm 10$                  |
| Ni(0)-Ni(4)-O(1)-Ni(0)                                                                                                                  | 12     | 4.1684                     | $11.5 \pm 1.3$ | $0.417 \pm 0.002$ | $7 \pm 2$                    |
| Ni(0)-O(1)-Ni(4)-O(1)-Ni(0)                                                                                                             | 6      | 4.1684                     | $5.8 \pm 0.7$  | $0.417 \pm 0.002$ | $2 \pm 9$                    |
| Ni(0)-O(5)-Ni(0)                                                                                                                        | 24     | 4.6604                     | $23.1 \pm 2.6$ | $0.466 \pm 0.002$ | $9 \pm 12$                   |
| Ni(0)-O(5)-O(1)-Ni(0)                                                                                                                   | 48     | 4.8461                     | $46.1 \pm 5.3$ | $0.485 \pm 0.002$ |                              |
| Ni(0)-Ni(6)-Ni(0)                                                                                                                       | 24     | 5.1052                     | $23.1 \pm 2.6$ | $0.510 \pm 0.002$ | $7 \pm 2$                    |
| NiO <sub>x</sub> /Ce <sub>2</sub> Zr <sub>2</sub> O <sub>8</sub> measured by conventional EXAFS (beam size: 1 mm x 1 mm)                |        |                            |                |                   |                              |
| $k = 30 - 110\text{ nm}^{-1}$ , $R_f = 15\%$ , $S_0^2 = 1.03 \pm 0.09$ , $\alpha = 1.000 \pm 0.004$ , $\Delta E_0 = -2 \pm 2\text{ eV}$ |        |                            |                |                   |                              |
| Ni(0)-O(1)-Ni(0)                                                                                                                        | 6      | 2.0842                     | $6.2 \pm 0.6$  | $0.208 \pm 0.001$ | 5.6                          |
| Ni(0)-Ni(2)-Ni(0)                                                                                                                       | 12     | 2.9475                     | $12.4 \pm 1.2$ | $0.295 \pm 0.001$ | 6.4                          |
| Ni(0)-O(3)-Ni(0)                                                                                                                        | 8      | 3.6099                     | $8.3 \pm 0.8$  | $0.361 \pm 0.001$ | $21 \pm 35$                  |
| Ni(0)-Ni(4)-Ni(0)                                                                                                                       | 6      | 4.1684                     | $6.2 \pm 0.6$  | $0.417 \pm 0.001$ | $0 \pm 7$                    |
| Ni(0)-Ni(4)-O(1)-Ni(0)                                                                                                                  | 12     | 4.1684                     | $12.4 \pm 1.2$ | $0.417 \pm 0.001$ | $7 \pm 1$                    |
| Ni(0)-O(1)-Ni(4)-O(1)-Ni(0)                                                                                                             | 6      | 4.1684                     | $6.2 \pm 0.6$  | $0.417 \pm 0.001$ | $2 \pm 6$                    |
| Ni(0)-O(5)-Ni(0)                                                                                                                        | 24     | 4.6604                     | $24.8 \pm 2.4$ | $0.466 \pm 0.002$ | $9 \pm 10$                   |
| Ni(0)-O(5)-O(1)-Ni(0)                                                                                                                   | 48     | 4.8461                     | $49.5 \pm 4.8$ | $0.485 \pm 0.002$ |                              |
| Ni(0)-Ni(6)-Ni(0)                                                                                                                       | 24     | 5.1052                     | $24.8 \pm 2.4$ | $0.511 \pm 0.002$ | $7 \pm 1$                    |
| NiO <sub>x</sub> /Ce <sub>2</sub> Zr <sub>2</sub> O <sub>8</sub> measured by $\mu$ -EXAFS (beam size: 1000 nm x 800 nm)                 |        |                            |                |                   |                              |
| $k = 30 - 110\text{ nm}^{-1}$ , $R_f = 45\%$ , $S_0^2 = 0.96 \pm 0.19$ , $\alpha = 0.988 \pm 0.010$ , $\Delta E_0 = -7 \pm 6\text{ eV}$ |        |                            |                |                   |                              |
| Ni(0)-O(1)-Ni(0)                                                                                                                        | 6      | 2.0842                     | $5.7 \pm 1.2$  | $0.206 \pm 0.002$ | 5.6                          |
| Ni(0)-Ni(2)-Ni(0)                                                                                                                       | 12     | 2.9475                     | $11.5 \pm 2.3$ | $0.291 \pm 0.003$ | 6.4                          |
| Ni(0)-O(3)-Ni(0)                                                                                                                        | 8      | 3.6099                     | $7.6 \pm 1.5$  | $0.357 \pm 0.003$ | 21                           |
| Ni(0)-Ni(4)-Ni(0)                                                                                                                       | 6      | 4.1684                     | $5.7 \pm 1.2$  | $0.412 \pm 0.004$ | $8 \pm 112$                  |
| Ni(0)-Ni(4)-O(1)-Ni(0)                                                                                                                  | 12     | 4.1684                     | $11.5 \pm 2.3$ | $0.412 \pm 0.004$ | $9 \pm 6$                    |
| Ni(0)-O(1)-Ni(4)-O(1)-Ni(0)                                                                                                             | 6      | 4.1684                     | $5.7 \pm 1.2$  | $0.412 \pm 0.004$ | $6 \pm 47$                   |
| Ni(0)-O(5)-Ni(0)                                                                                                                        | 24     | 4.6604                     | $22.9 \pm 4.6$ | $0.460 \pm 0.004$ | $13 \pm 44$                  |
| Ni(0)-O(5)-O(1)-Ni(0)                                                                                                                   | 48     | 4.8461                     | $45.8 \pm 9.2$ | $0.479 \pm 0.005$ |                              |
| Ni(0)-Ni(6)-Ni(0)                                                                                                                       | 24     | 5.1052                     | $22.9 \pm 4.6$ | $0.504 \pm 0.005$ | $8 \pm 4$                    |

## References

- [7] B. Ravel and M. Newville, *J. Synchrotron Rad.*, 2005, **12:4**, 537; M. Newville, *J. Synchrotron Rad.*, 2001, **8**, 322.
- [8] J. J. Rehr, R.C. Albers, *Rev. Mod. Phys.*, 2000, **72**, 621.
- [9] E. Groppo, C. Prestipino, C. Lamberti, P. Luches, C. Gipvanardi, F. Boscherini, *J. Phys. Chem. B*, 2003, **107**, 4597.
- [10] R. W. Cairns, E. Ott, *J. Am. Chem. Soc.*, 1933, **55**, 527.
